# Supplementary material
Source: PubMed Central journal article supplement (PMC11271247)
Supplement: NIHMS1861791-supplement-SupTab1.pdf [file NIHMS1861791-supplement-SupTab1.pdf]

Supplementary Table 3 continued: Drug list

| NCGC ID         | Name       | Primary Mechanism                    | Additional Mechanism | Phase       | Chemical Structure                                                                                                                                                                                                                                                                                                                                                                                                                       |
|-----------------|------------|--------------------------------------|----------------------|-------------|------------------------------------------------------------------------------------------------------------------------------------------------------------------------------------------------------------------------------------------------------------------------------------------------------------------------------------------------------------------------------------------------------------------------------------------|
| NCGC00346634-01 | WAY-600    | mTOR inhibitor                       | FRAP1                | Preclinical | 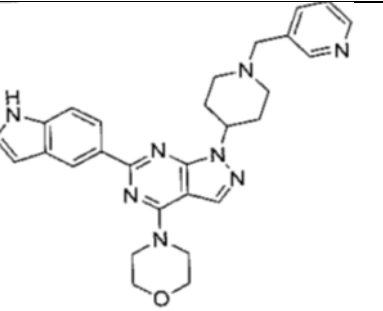 <p>The chemical structure of WAY-600 is a complex heterocyclic molecule. It features a central pyrazole ring system. One nitrogen of the pyrazole is substituted with a morpholine ring. The other nitrogen is substituted with a 2-pyridylmethyl group. Additionally, there is a 5-indolylmethyl group attached to the pyrazole ring.</p>           |
| NCGC00345842-01 | GSK-25     | ROCK Inhibitor                       |                      | Preclinical |  <p>The chemical structure of GSK-25 is a complex heterocyclic molecule. It features a central pyrazole ring system. One nitrogen of the pyrazole is substituted with a 4-chlorophenyl group. The other nitrogen is substituted with a 2-pyridylmethyl group. Additionally, there is a 5-indolylmethyl group attached to the pyrazole ring.</p>       |
| NCGC00345817-01 | GM-6001    | MMP Inhibitor                        |                      | Preclinical |  <p>The chemical structure of GM-6001 is a complex heterocyclic molecule. It features a central pyrazole ring system. One nitrogen of the pyrazole is substituted with a 4-chlorophenyl group. The other nitrogen is substituted with a 2-pyridylmethyl group. Additionally, there is a 5-indolylmethyl group attached to the pyrazole ring.</p>     |
| NCGC00263220-02 | Romidepsin | Histone Deacetylase (HDAC) Inhibitor |                      | Approved    |  <p>The chemical structure of Romidepsin is a complex heterocyclic molecule. It features a central pyrazole ring system. One nitrogen of the pyrazole is substituted with a 4-chlorophenyl group. The other nitrogen is substituted with a 2-pyridylmethyl group. Additionally, there is a 5-indolylmethyl group attached to the pyrazole ring.</p> |



Supplementary Table 3 continued: Drug list

| NCGC ID         | Name               | Primary Mechanism                          | Additional Mechanism                                                                                                                                                                       | Phase       | Chemical Structure                                                                                                                                                                                                                                                                                                                                                                          |
|-----------------|--------------------|--------------------------------------------|--------------------------------------------------------------------------------------------------------------------------------------------------------------------------------------------|-------------|---------------------------------------------------------------------------------------------------------------------------------------------------------------------------------------------------------------------------------------------------------------------------------------------------------------------------------------------------------------------------------------------|
| NCGC00263152-02 | Ponatinib          | FGFR Inhibitor                             | Bcr-Abl/VEGFR/FGFR/Tie2 Inhibitor                                                                                                                                                          | Phase II    | 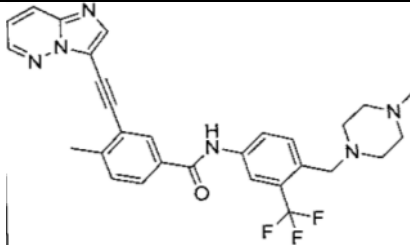 <p>The chemical structure of Ponatinib features a central benzene ring substituted with a morpholine ring, a trifluoromethyl group, and a carbonyl group. This carbonyl group is linked to another benzene ring, which is further substituted with a methyl group and a 1,2,4-triazole ring system.</p> |
| NCGC00263146-01 | SR-3306            | JNK 1/2/3 Inhibitor                        |                                                                                                                                                                                            | Preclinical |  <p>The chemical structure of SR-3306 consists of a central benzene ring with a morpholine ring and a pyridine ring attached. This central ring is connected via an amide bond to another benzene ring, which is further substituted with a pyridine ring and a morpholine ring.</p>                     |
| NCGC00249613-03 | Carfilzomib        | Proteasome Inhibitor                       |                                                                                                                                                                                            | phase II    |  <p>The chemical structure of Carfilzomib is a complex molecule featuring a central benzene ring with a morpholine ring and a carbonyl group. This carbonyl group is linked to another benzene ring, which is further substituted with a methyl group and a morpholine ring.</p>                         |
| NCGC00238453-01 | TAE-684            | Anaplastic Lymphoma Kinase (ALK) Inhibitor |                                                                                                                                                                                            | Preclinical |  <p>The chemical structure of TAE-684 features a central benzene ring with a morpholine ring and a carbonyl group. This carbonyl group is linked to another benzene ring, which is further substituted with a methyl group and a morpholine ring.</p>                                                   |
| NCGC00186460-01 | Bardoxolone methyl | NF-kappaB signaling Inhibitor              | NF-kappaB activation/Nitric Oxide Production Inhibitor; Glutathione Reductase (NADPH)/Nuclear Factor, Erythroid Derived 2, Like 2 (Nrf2)/Heme Oxygenase Activator; Bcl-2/PPARgamma Agonist | Phase III   |  <p>The chemical structure of Bardoxolone methyl is a complex polycyclic molecule with multiple rings, including a benzene ring, a morpholine ring, and a carbonyl group. It also features a nitrile group and a methyl group.</p>                                                                     |

Supplementary Table 3 continued: Drug list

| NCGC ID         | Name             | Primary Mechanism           | Additional Mechanism                                                                                            | Phase       | Chemical Structure                                                                    |
|-----------------|------------------|-----------------------------|-----------------------------------------------------------------------------------------------------------------|-------------|---------------------------------------------------------------------------------------|
| NCGC00181129-05 | Dasatinib        | Bcr-Abl inhibitor           | BTK/Src inhibitor, multikinase                                                                                  | Approved    | 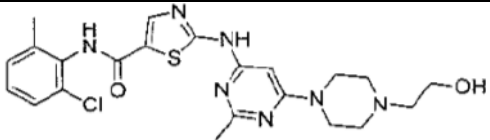   |
| NCGC00164631-03 | Sunitinib malate | VEGFR-1/2/3 Inhibitor       | CSF1R (c-FMS) Inhibitors Flt3 (FLK2/STK1) Inhibitors KIT (C-KIT) Inhibitors PDGFRbeta Inhibitors RET Inhibitors | Approved    |    |
| NCGC00095055-03 | Salinomycin      | Anticoccidial/Antibacterial |                                                                                                                 | Preclinical |   |
| NCGC00015735-12 | Niclosamide      | STAT-3 Inhibitor            | mTORC Inhibitor, antiparasitic/antiviral                                                                        | Approved    |  |

Supplementary Table 3 continued: Drug list

| NCGC ID         | Name                          | Primary Mechanism                                                                    | Additional Mechanism       | Phase       | Chemical Structure |
|-----------------|-------------------------------|--------------------------------------------------------------------------------------|----------------------------|-------------|--------------------|
| NCGC00345829-01 | PD-173955                     | cSRC inhibitor                                                                       | BCR-Abl inhibitor          | Preclinical |                    |
| NCGC00242514-01 | Sepantronium bromide          | Survivin inhibitor                                                                   | BIRC5 Expression Inhibitor | Phase II    |                    |
| NCGC00013226-15 | Trifluoperazine hydrochloride | Nav1.4 (SkM1) Sodium Channel Blockers<br>Nav1.7 (PN1/hNE-Na) Sodium Channel Blockers | Dopamine D2 Antagonists    | Approved    |                    |
| NCGC00014873-04 | HLI-373989                    | MDM2 (hdm2) Inhibitor                                                                |                            | Preclinical |                    |

Supplementary Table 3 continued: Drug list

| NCGC ID         | Name                       | Primary Mechanism                          | Additional Mechanism                                                               | Phase    | Chemical Structure                                                                    |
|-----------------|----------------------------|--------------------------------------------|------------------------------------------------------------------------------------|----------|---------------------------------------------------------------------------------------|
| NCGC00014925-07 | Topotecan hydrochloride    | DNA Topoisomerase I Inhibitors             |                                                                                    | Approved | 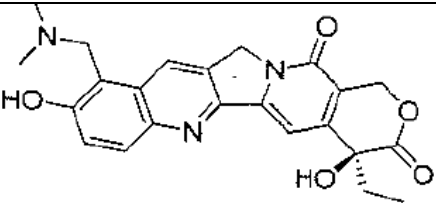   |
| NCGC00015096-11 | Amiodarone hydrochloride   | Muscarinic M3 Receptor Ligand              | Drugs Acting on Hyperpolarization-activated Cyclic Nucleotide-Gated (HCN) Channels | Approved |    |
| NCGC00015147-09 | Benzamil                   | Epithelial Sodium Channels (ENaC) Blockers | antimalarial agents                                                                | Phase II |    |
| NCGC00015163-08 | Benserazide                | DOPA decarboxylase inhibitor               |                                                                                    | Approved |   |
| NCGC00015264-08 | Clomipramine hydrochloride | Serotonin Transporter (SERT) Inhibitor     |                                                                                    | Approved |  |

Supplementary Table 3 continued: Drug list

| NCGC ID         | Name                        | Primary Mechanism                                                           | Additional Mechanism           | Phase       | Chemical Structure                                                                    |
|-----------------|-----------------------------|-----------------------------------------------------------------------------|--------------------------------|-------------|---------------------------------------------------------------------------------------|
| NCGC00015977-02 | SK&F-89976A                 | GAT-1 Inhibitor                                                             |                                | Preclinical | 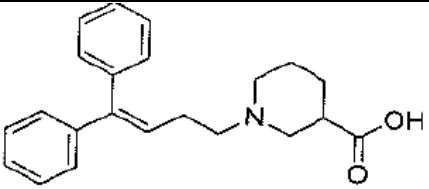   |
| NCGC00017354-06 | Spectinomycin hydrochloride | Antibiotic                                                                  |                                | Approved    |    |
| NCGC00017363-10 | Cycloheximide               | Glycogen Synthase Kinase 3 beta (GSK-3beta; tau Protein Kinase I) Inhibitor | tau Protein Kinase I Inhibitor | Approved    |    |
| NCGC00017394-08 | G-Strophanthin              | Na+/K+-ATPase Inhibitors                                                    |                                | Preclinical |   |
| NCGC00090797-11 | Digoxin                     | Steroid                                                                     |                                | Approved    |  |



Supplementary Table 3 continued: Drug list

| NCGC ID         | Name        | Primary Mechanism                               | Additional Mechanism                | Phase       | Chemical Structure                                                                   |
|-----------------|-------------|-------------------------------------------------|-------------------------------------|-------------|--------------------------------------------------------------------------------------|
| NCGC00092289-01 | DA-3003-1   | Cell Division Cycle CDC25 Phosphatase Inhibitor |                                     | Preclinical | 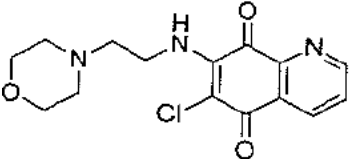  |
| NCGC00093560-06 | Finasteride | Androgen Receptor Antagonist                    | Steroid 5alpha-Reductase Inhibitors | Approved    |   |
| NCGC00095145-01 | Cantharidin | PP-1 Inhibitors<br>PP-2A Inhibitors             |                                     | Approved    |   |
| NCGC00163489-04 | Shikonin    | Drugs Acting on Chemokine Receptors             | TNF Expression Inhibitors           | Preclinical |  |
