# Supplementary material
Source: PubMed Central journal article supplement (PMC11271247)
Supplement: NIHMS1861791-supplement-SupTab2.pdf [file NIHMS1861791-supplement-SupTab2.pdf]

| Compound name               | IC <sub>50</sub> ATP (μM) |             |
|-----------------------------|---------------------------|-------------|
|                             | homotypic                 | heterotypic |
| HMSL10084                   | 0.389                     | 0.333       |
| AV-412                      | 3.107                     | 1.292       |
| TAK-733                     | 0.005                     | 0.007       |
| SR-3306                     | 0.050                     | 0.058       |
| TAE-684                     | 0.414                     | 0.155       |
| Cantharidin                 | 1.279                     | 3.168       |
| Dasatinib                   | 0.133                     | 0.077       |
| VU0483488-1                 | *n.d.                     | *n.d.       |
| Obatoclox                   | 0.296                     | 0.609       |
| Nicosamide                  | 1.843                     | 1.668       |
| PD-173955                   | 0.668                     | 0.479       |
| Sepantronium bromide        | 0.057                     | 0.279       |
| PNU-74654                   | *n.d.                     | 21.16       |
| WAY-600                     | 5.879                     | 1.681       |
| Torin-2                     | 0.024                     | 0.027       |
| Romidepsin                  | 0.001                     | 0.005       |
| Carfilzomib                 | 0.018                     | 0.067       |
| Bardoxolone methyl          | 1.414                     | 1.414       |
| Cycloheximide               | 0.219                     | 0.022       |
| GSK-25                      | 9.489                     | 6.099       |
| GM-6001                     | *n.d.                     | *n.d.       |
| Ponatinib                   | 0.201                     | 0.055       |
| Sunitinib malate            | 1.975                     | 5.270       |
| HLI-373989                  | 1.366                     | 3.755       |
| DA-3003-1                   | 2.049                     | 7.359       |
| Topotecan hydrochloride     | 0.023                     | 0.025       |
| Salinomycin                 | 0.393                     | 1.530       |
| Stelazine trifluoperzine    | 4.952                     | *n.d.       |
| Amiodarone                  | *n.d.                     | 56.46       |
| Benzamil                    | 15.57                     | 113.5       |
| Benserazide                 | *n.d.                     | *n.d.       |
| Clomipramine hydrochloride  | *n.d.                     | *n.d.       |
| SK&F-89976A                 | *n.d.                     | 15.28       |
| Spectinomycin hydrochloride | *n.d.                     | *n.d.       |
| G-Strophanthin              | 0.037                     | 0.070       |
| Digoxin                     | 0.054                     | 0.107       |
| Finasteride                 | 51.38                     | *n.d.       |
| Shikonin                    | 1.267                     | 5.954       |
