# Supplementary material
Source: PubMed Central journal article supplement (PMC11271247)
Supplement: NIHMS1861791-supplement-SupTab6.pdf [file NIHMS1861791-supplement-SupTab6.pdf]

| rank | HEY/NIH            |                    | SKOV/NIH           |                    | PANC/NIH           |                    |
|------|--------------------|--------------------|--------------------|--------------------|--------------------|--------------------|
|      | 3-Parameter        | 5-Parameter        | 3-Parameter        | 5-Parameter        | 3-Parameter        | 5-Parameter        |
| 1    | Romidepsin         | Dasatinib          | SR-3306            | AV-412             | Torin-2            | Salinomycin        |
| 1    | TAK-733            | TAK-733            | AV-412             | Carfilzomib        | Salinomycin        | SR-3306            |
| 3    | Bardoxolone methyl | Salinomycin        | Ponatinib          | Torin-2            | SR-3306            | Carfilzomib        |
| 4    | Torin-2            | Carfilzomib        | Carfilzomib        | Dasatinib          | TAK-733            | Torin-2            |
| 4    | Carfilzomib        | Romidepsin         | Bardoxolone methyl | SR-3306            | Ponatinib          | Bardoxolone methyl |
| 4    | Dasatinib          | Bardoxolone methyl | TAE-684            | Salinomycin        | HMSL10084          | Ponatinib          |
| 7    | Ponatinib          | Ponatinib          | HMSL10084          | Bardoxolone methyl | Carfilzomib        | TAE-684            |
| 8    | Sunitinib malate   | AV-412             | Romidepsin         | Obatoclax          | TAE-684            | Dasatinib          |
| 9    | SR-3306            | Torin-2            | TAK-733            | WAY-600            | AV-412             | TAK-733            |
| 10   | Obatoclax          | Sunitinib malate   | Torin-2            | PNU-74654          | Dasatinib          | Obatoclax          |
| 11   | Salinomycin        | TAE-684            | Obatoclax          | HMSL10084          | Romidepsin         | HMSL10084          |
| 12   | TAE-684            | Obatoclax          | Salinomycin        | Sunitinib malate   | Obatoclax          | AV-412             |
| 13   | AV-412             | HMSL10084          | Sunitinib malate   | GM-6001            | Bardoxolone methyl | Romidepsin         |
| 14   | Niclosamide        | Niclosamide        | Dasatinib          | TAE-684            | WAY-600            | GM-6001            |
| 15   | HMSL10084          | SR-3306            | GM-6001            | TAK-733            | GSK-25             | WAY-600            |
| 16   | WAY-600            | WAY-600            | WAY-600            | Ponatinib          | GM-6001            | GSK-25             |
| 17   | PNU-74654          | PNU-74654          | PNU-74654          | GSK-25             | VU0483488-1*       | VU0483488-1*       |
| 18   | GSK-25             | GSK-25             | Niclosamide        | Romidepsin         | PNU-74654*         | PNU-74654*         |
| 19   | GM-6001*           | GM-6001*           | GSK-25             | VU0483488-1        | Sunitinib malate*  | Sunitinib malate*  |
| 20   | VU0483488-1*       | VU0483488-1*       | VU0483488-1        | Niclosamide        | Niclosamide*       | Niclosamide*       |

\* tumor growth NaN
